# Supplementary material
Source: PubMed Central journal article supplement (PMC3318120)
Supplement: mmc1.pdf [file mmc1.pdf]

# **Lifetime of Major Histocompatibility Complex Class-I Membrane Clusters Is Controlled by the Actin Cytoskeleton**

Yael Lavi,<sup>†</sup> Nir Gov,<sup>‡</sup> Michael Edidin,<sup>§</sup> and Levi A. Gheber<sup>†</sup>

<sup>†</sup>Avram and Stella Goldstein-Goren Department of Biotechnology Engineering, Ben-Gurion University of the Negev, Beer-Sheva, Israel; <sup>‡</sup>Department of Chemical Physics, Weizmann Institute of Science, Rehovot, Israel; and <sup>§</sup>Department of Biology, The Johns Hopkins University, Baltimore, Maryland

## **Supporting Material**

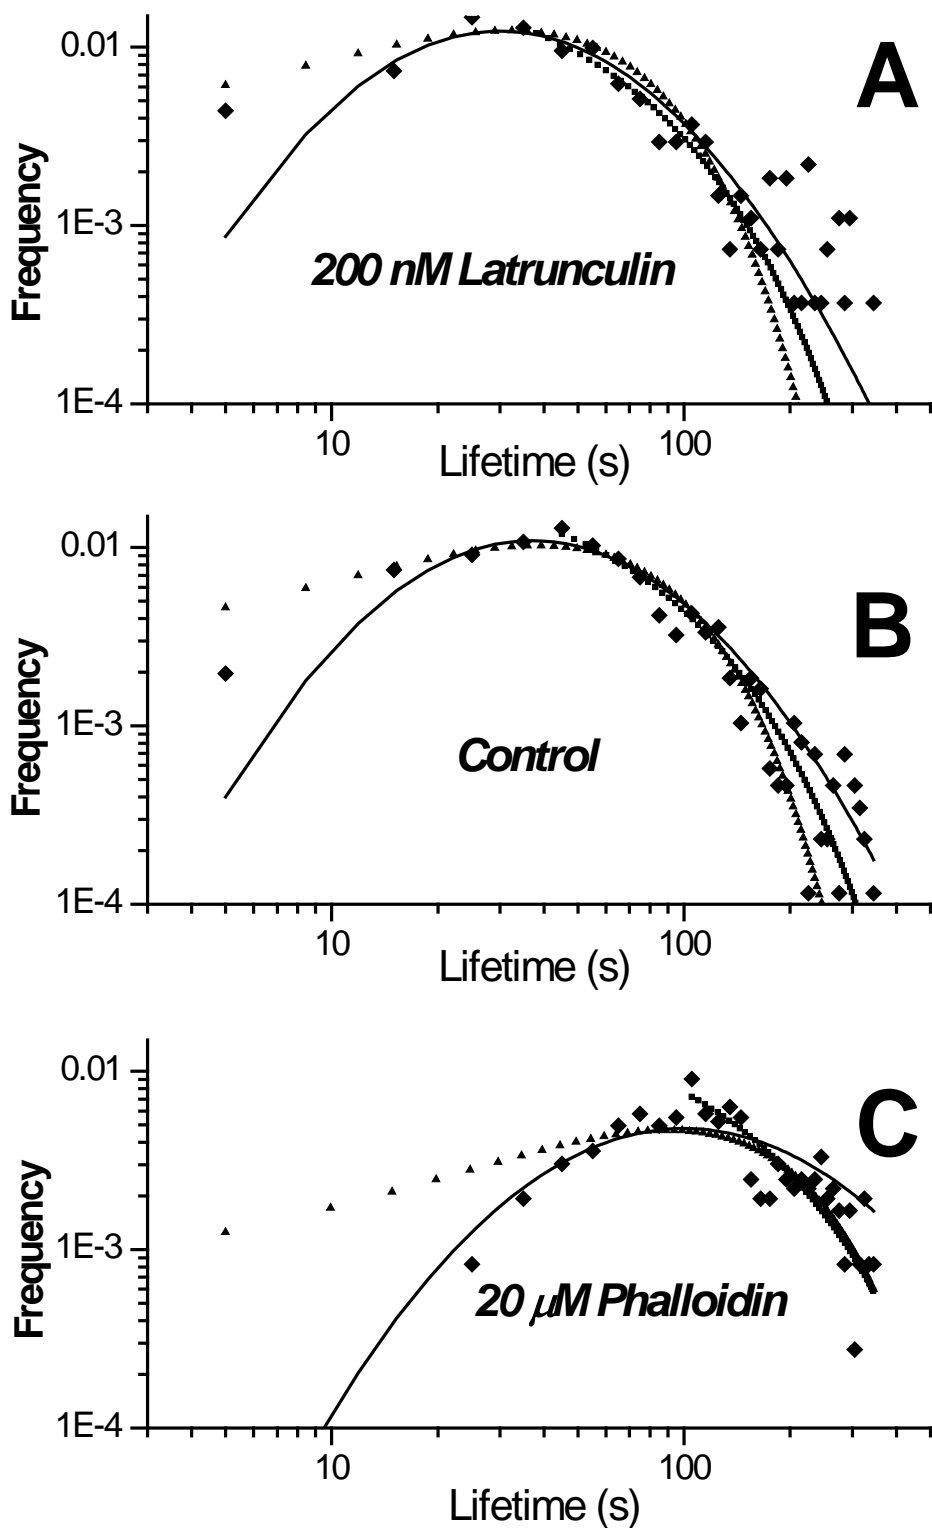

**Figure S1:** Log-log plot of the data shown in figure 6 in the manuscript. The figure shows fitting of experimental data with equation (3) (solid line), equation (5) (dotted line) and equation (7) (triangles) for the treatment with 200 nM Latrunculin (A), control cells (B) and 20 μM Phalloidin (C). The fitting parameters for each equation are given in Table1.
